# Supplementary material for: Structural features of DNA that determine RNA polymerase II core promoter
Source: PubMed Central journal article supplement (PMC5123417; doi:10.1186/s12864-016-3292-z), 2016-11-25
Supplement: 12864_2016_3292_MOESM1_ESM.pdf [file 12864_2016_3292_MOESM1_ESM.pdf]

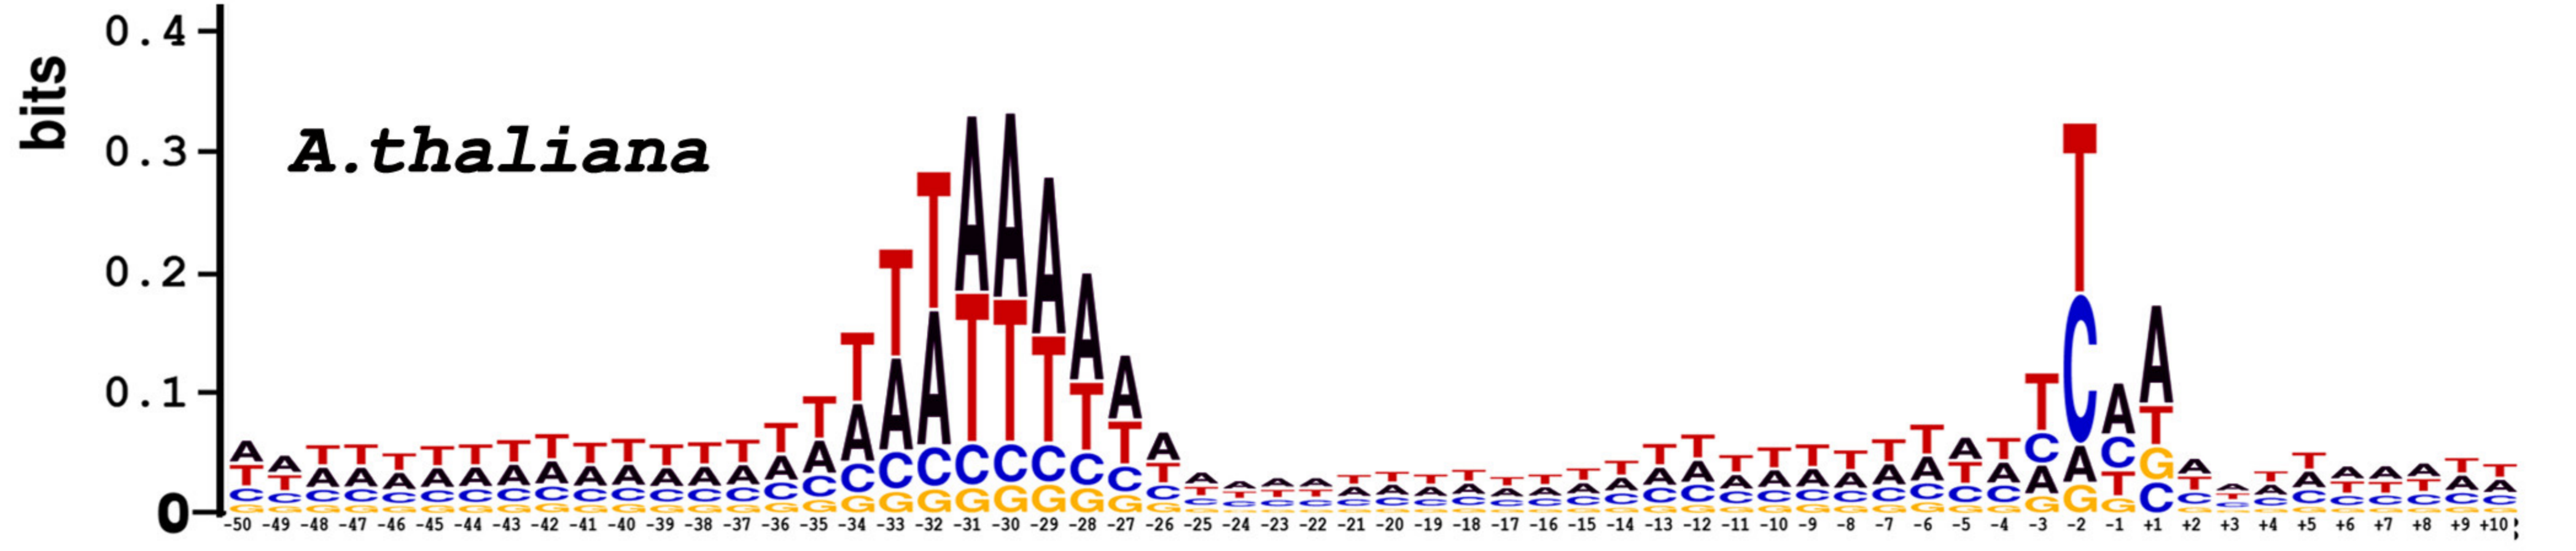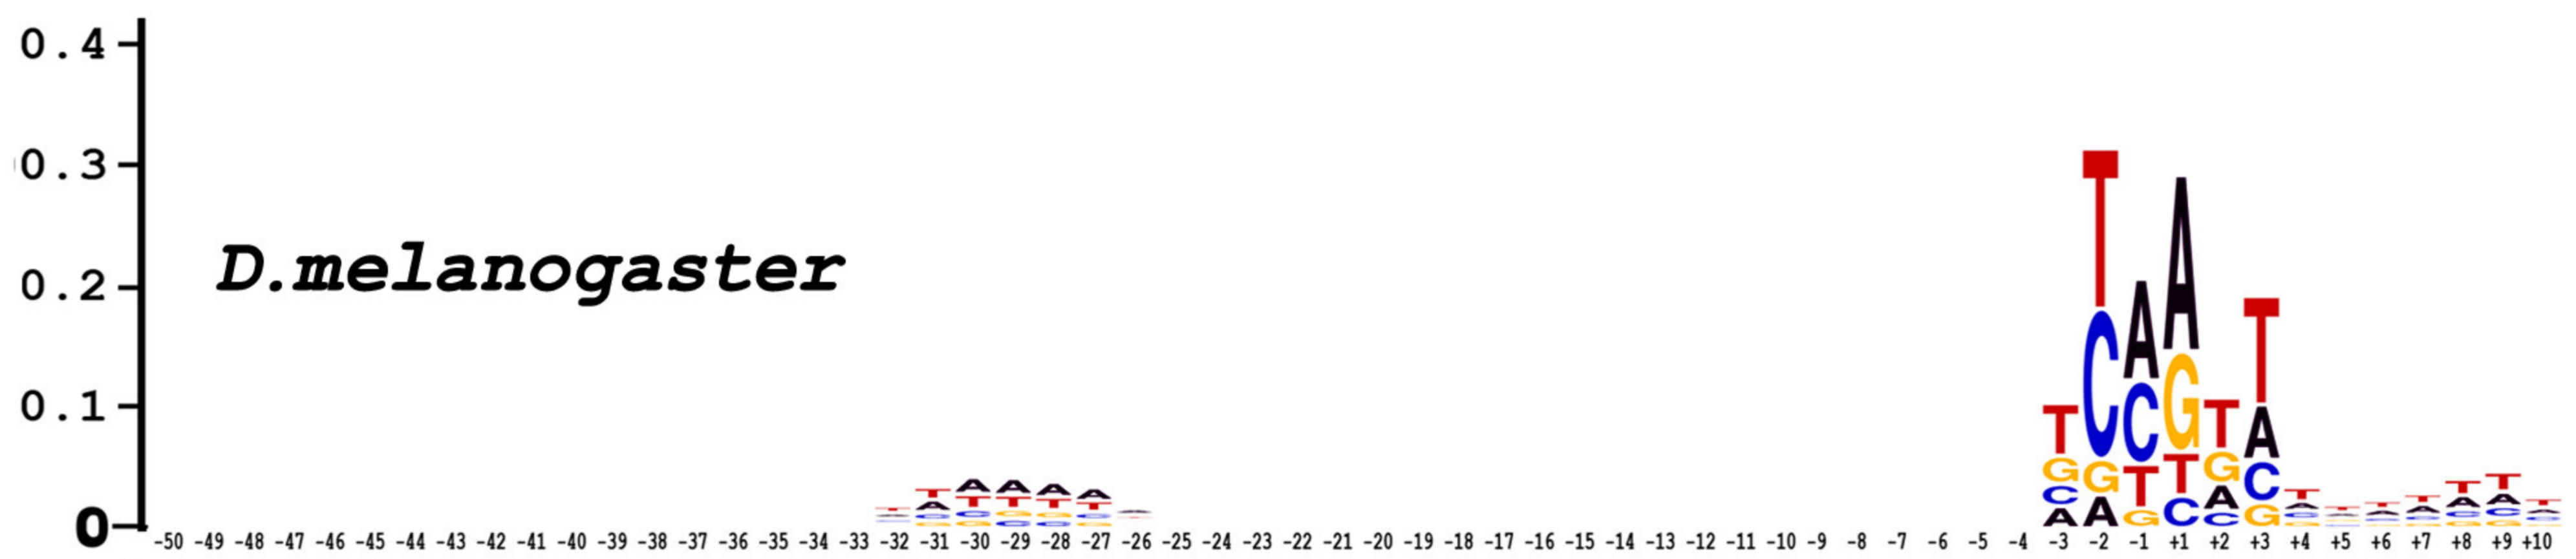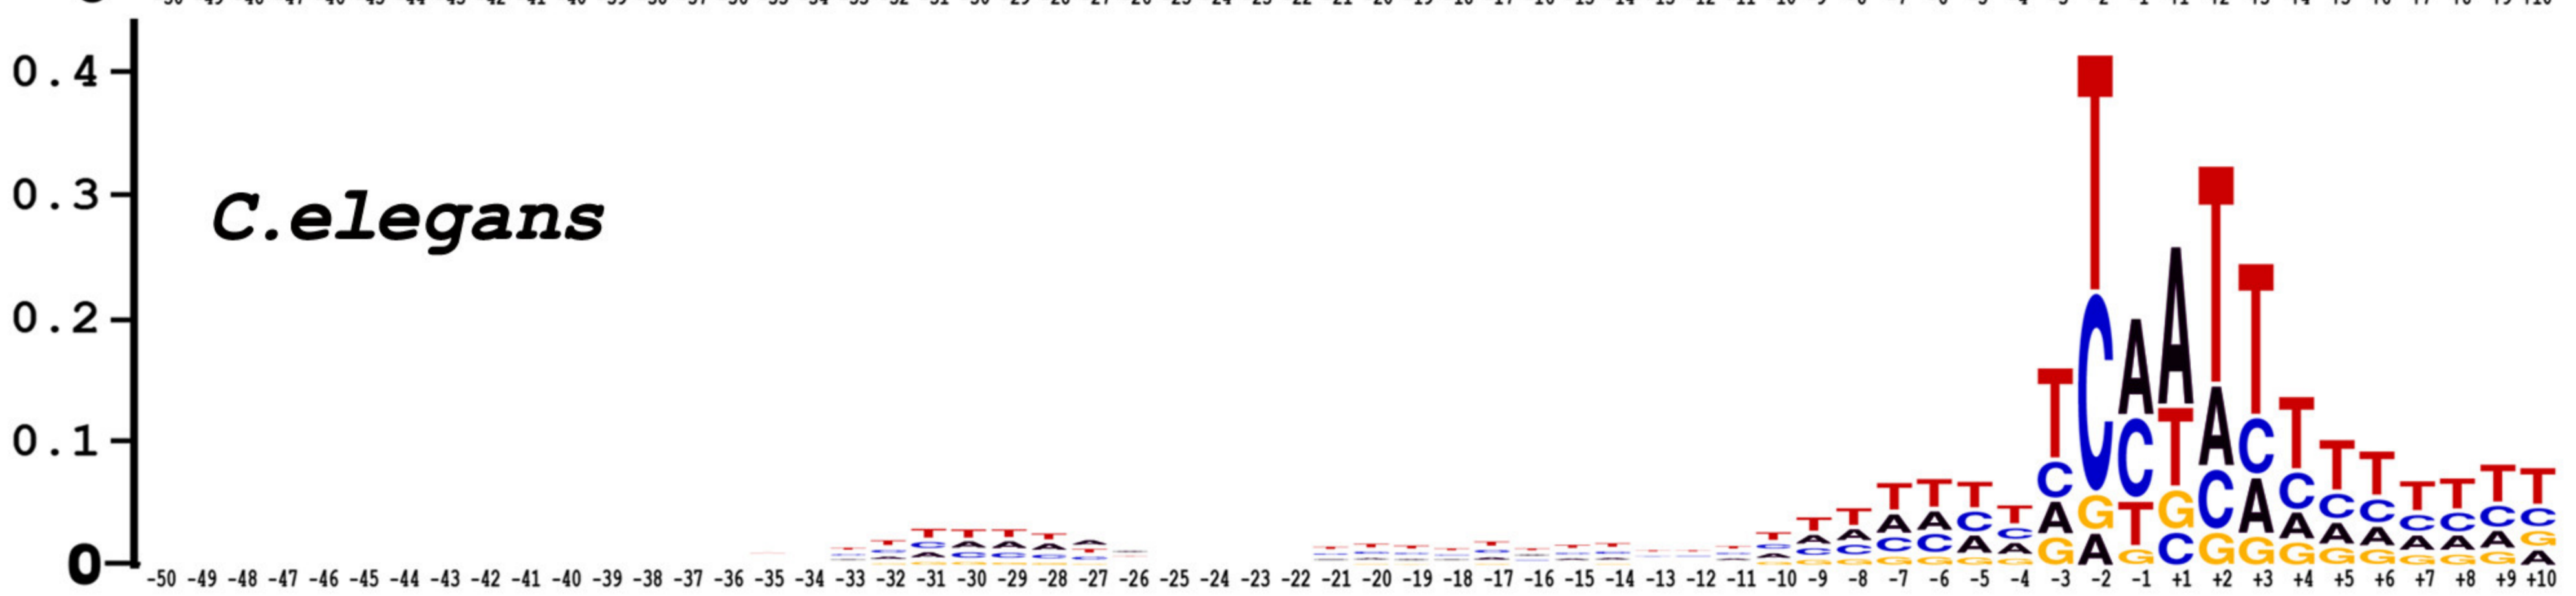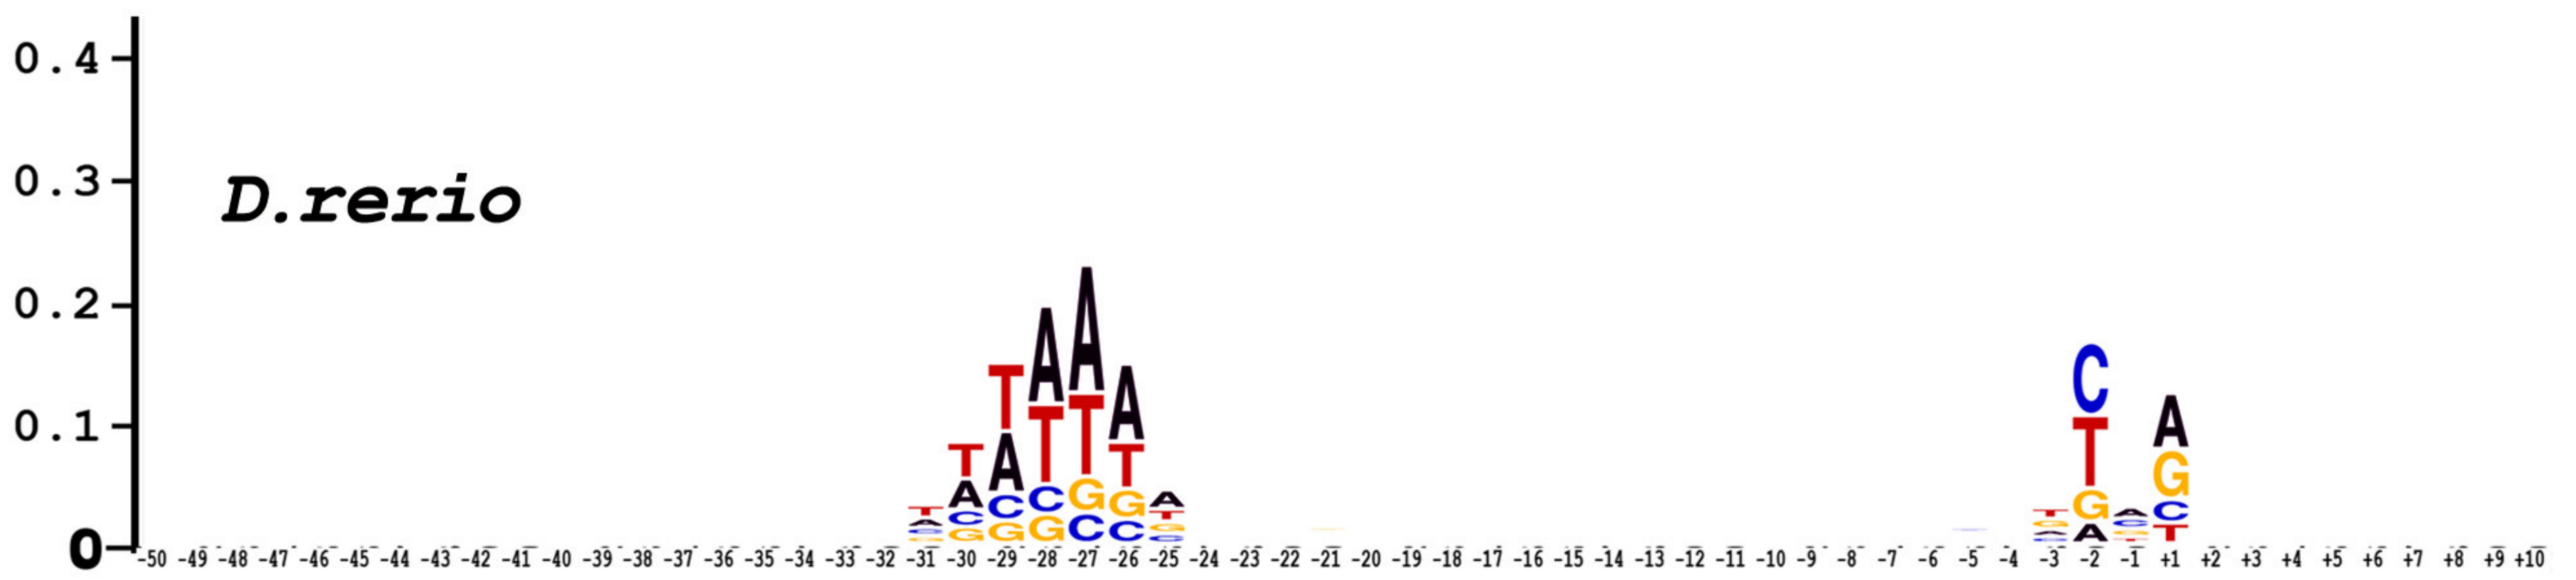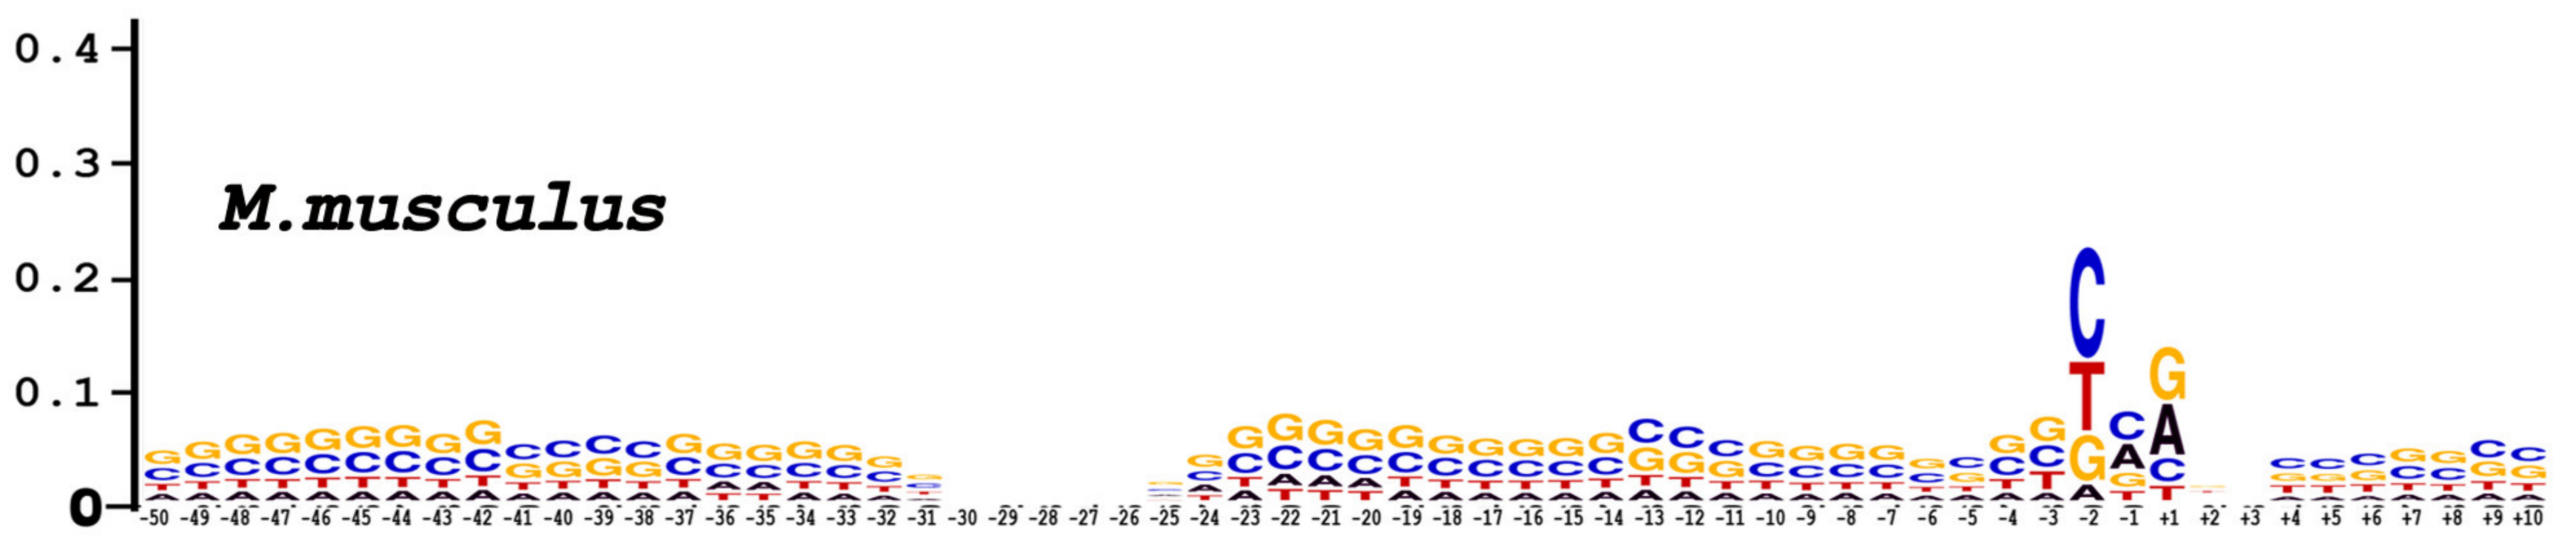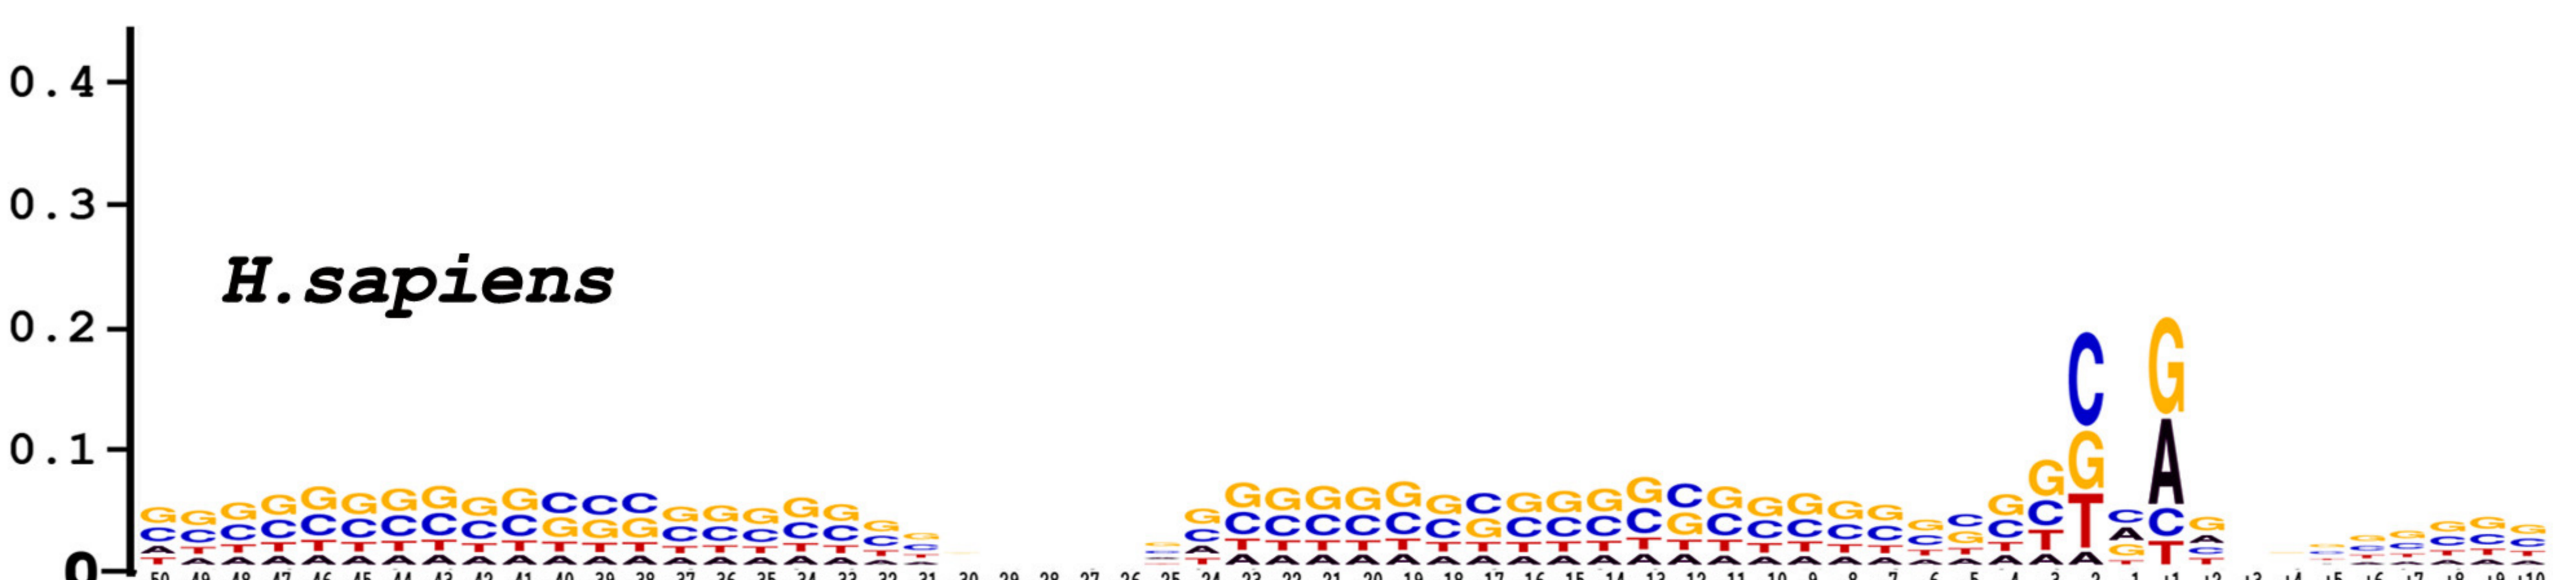

5'

3'
