# Supplementary material for: Structural features of DNA that determine RNA polymerase II core promoter
Source: PubMed Central journal article supplement (PMC5123417; doi:10.1186/s12864-016-3292-z), 2016-11-25

## Ultrasound indexes for *A. thaliana*

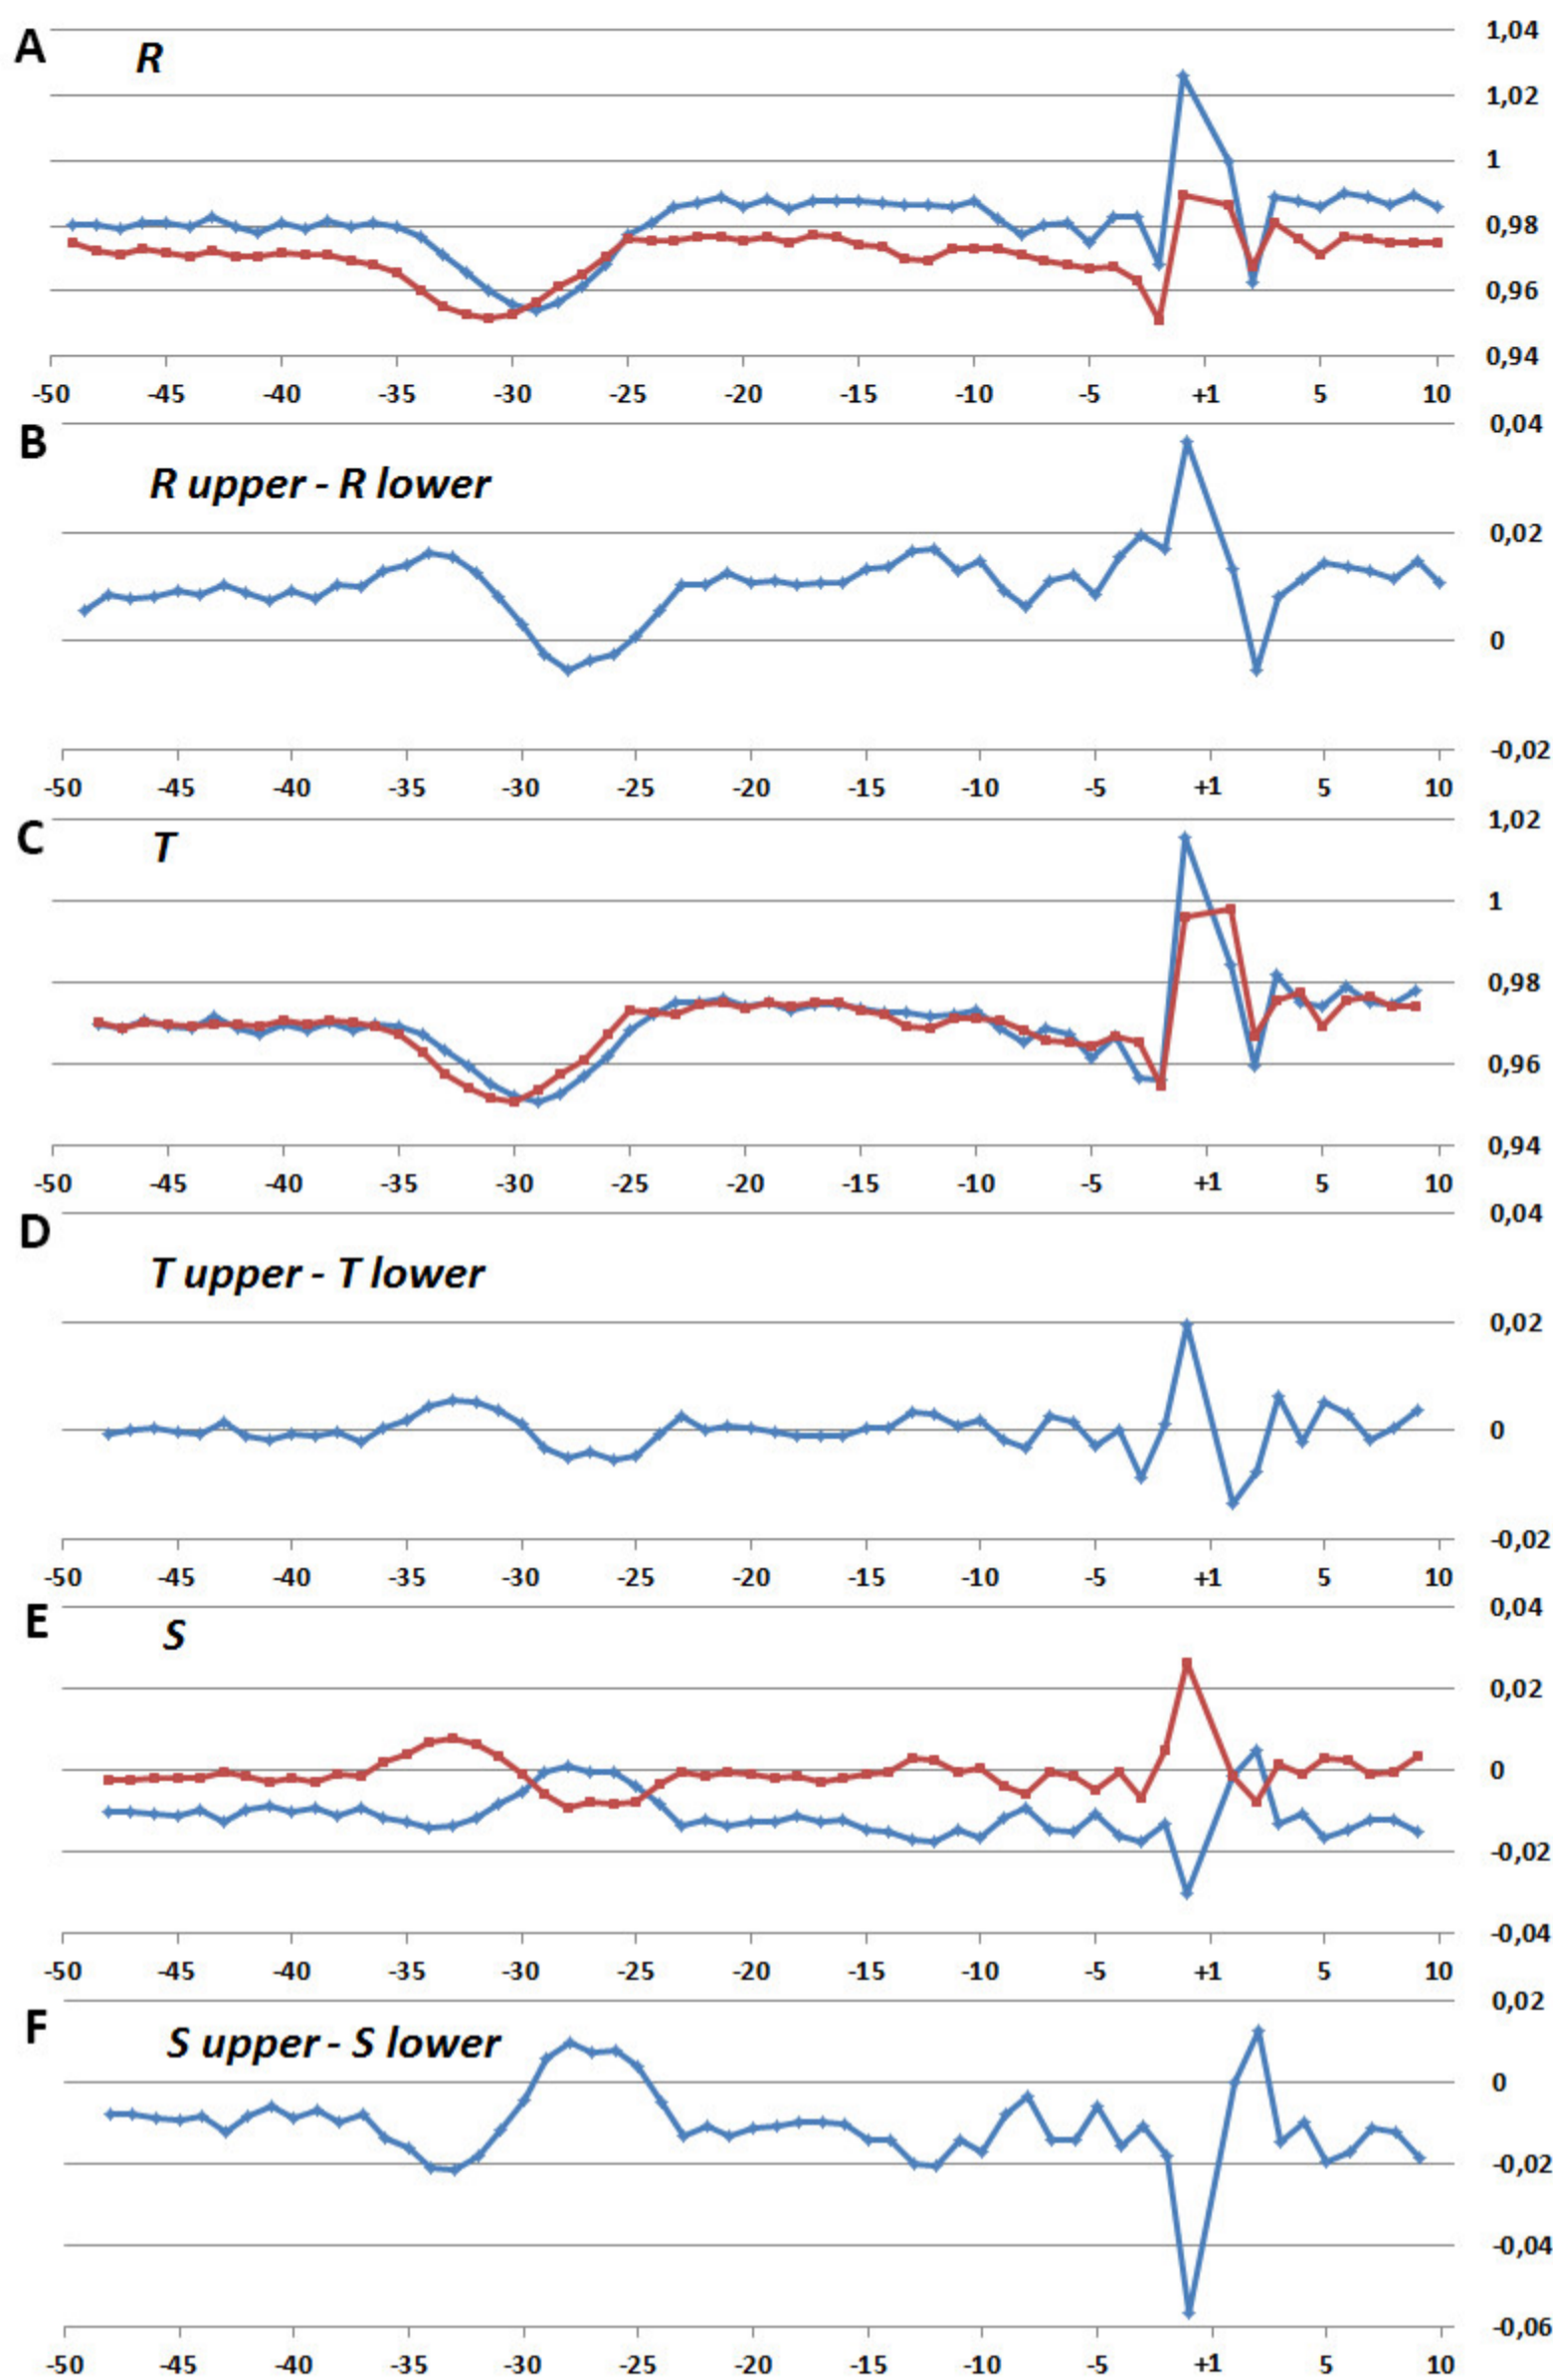

## DNase indexes for *A. thaliana*

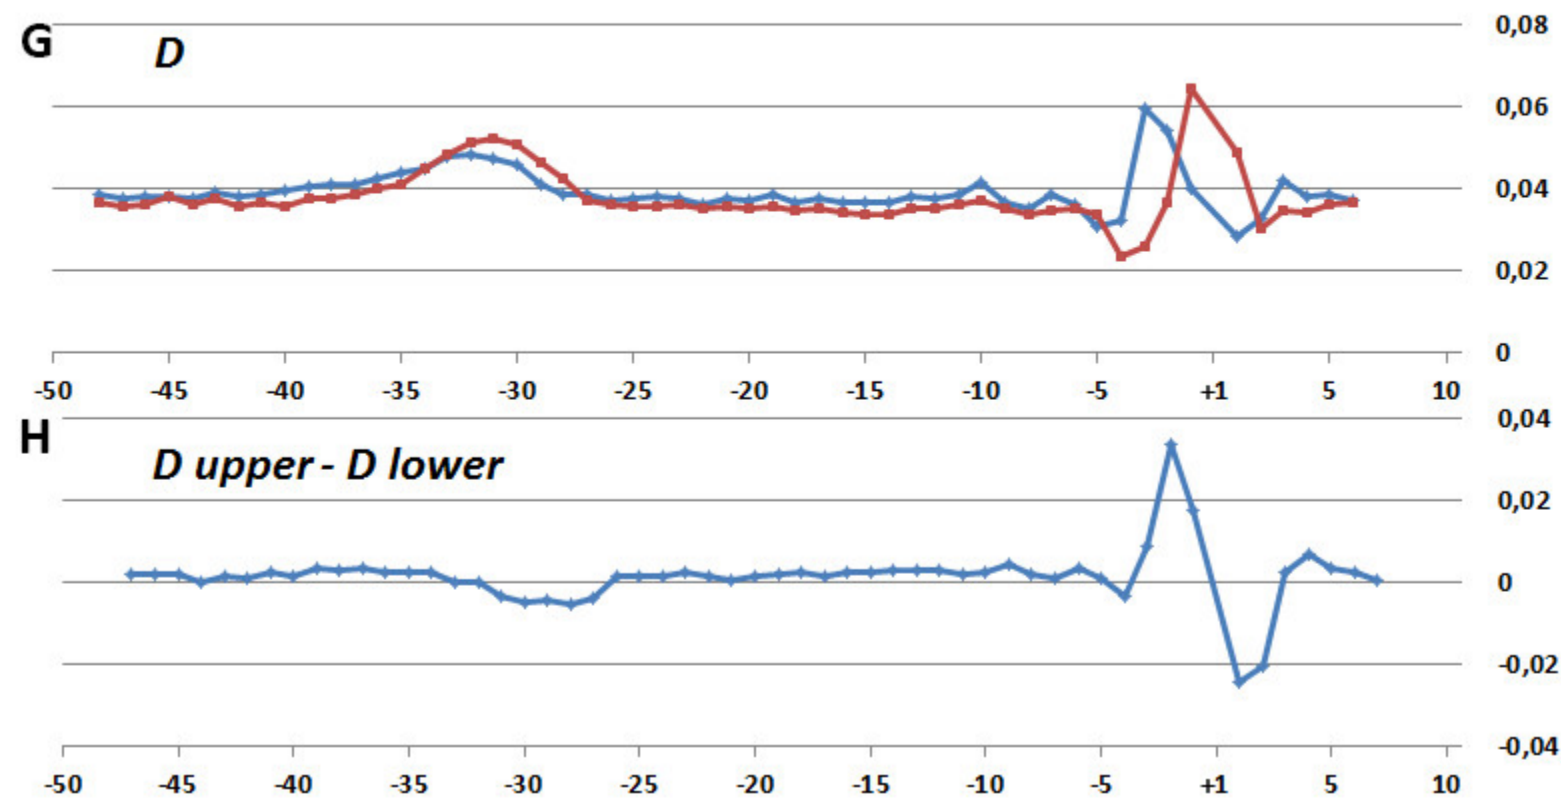

Supplement: 12864_2016_3292_MOESM7_ESM.pdf [file 12864_2016_3292_MOESM7_ESM.pdf]
